# Supplementary material for: Identification and Characterization of a Novel Chemotype MEK Inhibitor Able to Alter the Phosphorylation State of MEK1/2
Source: PubMed Central journal article supplement (PMC3681492; doi:10.18632/oncotarget.747), 2012-12-01

# Identification and Characterization of a Novel Chemotype MEK Inhibitor Able to Alter the Phosphorylation State of MEK1/2 – Yoshida et al

**Synthesis and NMR Data of Chemical probes JTP-74100, JTP-74099 and Other Compounds.** The synthetic procedure and characterization data for JTP-74057 have been reported (Abe H. et al; 2011). The syntheses of other JTP-compounds were carried out according to the general synthetic method as described in the same reference. The characterization data of compounds in **Figure 1** are as follows, except for JTP-74057 and PD0325901.

## **JTP-70945.**

*N*-{3-[3-Cyclopropyl-5-(2-fluoro-4-iodophenylamino)-8-methyl-2,4,7-trioxo-3,4,7,8-tetrahydro-2*H*-pyrido[2,3-*d*]pyrimidin-1-yl]phenyl}methane sulfonamide. <sup>1</sup>H NMR (300 MHz, DMSO-*d*<sub>6</sub>) δ 0.74 (m, 2H), 1.03 (m, 2H), 2.65 (s, 4H), 3.02 (s, 3H), 5.38 (s, 1H), 7.13 (d, *J* = 8.6 Hz, 1H), 7.20–7.40 (m, 3H), 7.46 (t, *J* = 8.1 Hz, 1H), 7.63 (d, *J* = 9.3 Hz, 1H), 7.81 (d, *J* = 10.1 Hz, 1H), 10.00 (s, 1H), 10.54 (s, 1H); MS (ESI) *m/z* 638 (M+H)<sup>+</sup>.

## **JTP-65634.**

5-(2-Methoxyphenylamino)-8-methyl-1,3-diphenyl-1*H*,8*H*-pyrido[2,3-*d*]pyrimidine-2,4,7-trione. <sup>1</sup>H NMR (400 MHz, CDCl<sub>3</sub>) δ 2.89 (s, 3H), 3.83 (s, 3H), 5.83 (s, 1H), 6.95 (t, *J* = 8.1 Hz, 2H), 7.16 (td, *J* = 7.2, 1.6 Hz, 1H), 7.28–7.32 (m, 2H), 7.35–7.54 (m, 9H), 10.21 (s, 1H); MS (ESI) *m/z* 467 (M+H)<sup>+</sup>.

## **JTP-74100.**

3-Amino-*N*-{3-[3-cyclopropyl-5-(2-fluoro-4-iodophenylamino)-6,8-dimethyl-2,4,7-trioxo-3,4,6,7-tetrahydro-2*H*-pyrido[4,3-*d*]pyrimidin-1-yl]-phenyl}propionamide hydrochloride. <sup>1</sup>H NMR (300 MHz, DMSO-*d*<sub>6</sub>) δ 0.66 (m, 2H), 0.95 (m, 2H), 1.26 (s, 3H), 2.62 (m, 1H), 2.73 (t, *J* = 6.6 Hz, 2H), 3.08 (s, 3H), 3.09 (m, 2H), 6.92 (t, *J* = 8.5 Hz, 1H), 7.06 (d, *J* = 7.5 Hz, 1H), 7.39 (t, *J* = 7.9 Hz, 1H), 7.53–7.64 (m, 2H), 7.67 (s, 1H), 7.78–7.88 (m, 4H), 10.37 (s, 1H), 11.07 (s, 1H); MS (ESI) *m/z* 645 (M+H)<sup>+</sup>.

**JTP-74099.**

3-Amino-*N*-{3-[3-cyclopropyl-5-(2-fluorophenylamino)-6,8-dimethyl-2,4,7-trioxo-3,4,6,7-tetrahydro-2*H*-pyrido[4,3-*d*]pyrimidin-1-yl]-phenyl}propionamide hydrochloride. <sup>1</sup>H NMR (300 MHz, DMSO-*d*<sub>6</sub>) δ 0.68 (m, 2H), 0.96 (m, 2H), 1.26 (s, 3H), 2.63 (m, 1H), 2.73 (t, *J* = 6.4 Hz, 2H), 3.05 (s, 3H), 3.07 (m, 2H), 7.06 (d, *J* = 9.0 Hz, 1H), 7.11–7.32 (m, 3H), 7.32–7.43 (m, 2H), 7.61 (d, *J* = 7.9 Hz, 1H), 7.67 (s, 1H), 7.83 (brs, 3H), 10.38 (s, 1H), 11.23 (s, 1H); MS (ESI) *m/z* 519 (M+H)<sup>+</sup>.

**Peptide Sequences Identified in 46 kDa Proteins by LC-MS/MS Analysis.**

Proteins of 46 kDa band (**Figure 2A**) were identified as MEK1 and MEK2 by LC-MS/MS and Mascot search. In brief, the individual protein bands in SDS-PAGE gels were excised and subjected to in-gel digestion with trypsin. The digested peptides were desalted and analyzed with a nanoLC-MS/MS system with a Q-ToF mass spectrometer (Waters Micromass). The NCBI database was searched using the Mascot search engine (Matrix Science) to identify homologous proteins. As shown in the **Supplemental Table**, the coverage of MEK1 and MEK2 by the identified peptides was 24% and 12%, respectively, without any significant homologies to other human proteins.

**Supplemental Table: Identified Peptide Sequences of 46 kDa Proteins.**

| ACCESSION /protein name                                | Start – End /score | Obsrved m/z | Mr(expt) | Mr(calc) | Sequence                              |
|--------------------------------------------------------|--------------------|-------------|----------|----------|---------------------------------------|
| gi 5579478 /mitogen-activated protein kinase kinase 1  | 4–36 / 86          | 819.95      | 3275.77  | 3275.70  | KKPTPIQLNPAPDGSAV<br>-NGTSSAETNLFALQK |
|                                                        | 60–70 /30          | 432.22      | 1293.63  | 1293.61  | VGELKDDDFEK                           |
|                                                        | 60–70 /62          | 647.83      | 1293.65  | 1293.61  | VGELKDDDFEK                           |
|                                                        | 71–84 /79          | 674.83      | 1346.75  | 1346.72  | ISELGAGNGGVVFK                        |
|                                                        | 85–96 /16          | 641.40      | 1280.79  | 1280.70  | VSHKPSGLVMAR                          |
|                                                        | 161–168 /40        | 449.28      | 896.55   | 896.63   | PEQILGK                               |
| hi 13489054 /mitogen-activated protein kinase kinase 2 | 190–201 /26        | 671.40      | 1340.79  | 1340.74  | DVKPSNILVNSR                          |
|                                                        | 261–269 /30        | 499.28      | 996.56   | 996.53   | YIPIPPFAK                             |
|                                                        | 75–86 /67          | 651.38      | 1300.74  | 1300.70  | ISELGAGNGGVVTK                        |
|                                                        | 194–205 /26        | 671.40      | 1340.79  | 1340.74  | DVKPSNILVNSR                          |
|                                                        | 265–273 /30        | 499.28      | 996.55   | 996.53   | YIPIPPDAK                             |
| protein kinase kinase 2                                | 333–348 /20        | 926.49      | 1850.97  | 1850.92  | LPNGVFTPDFQEFVNK                      |
|                                                        | 333–348 /29        | 926.50      | 1850.99  | 1850.92  | LPNGVFTPDFQEFVNK                      |

**Supplemental Figure: Alterations of downstream signaling molecules in cancer cells by JTP-74057 and PD0325901.** (A, B) HT-29 cells (A) and ACHN cells (B) were treated with the indicated concentrations of each compound for 24 h, same as the experiment of **Figure 3A**. And the cell lysates were analyzed by western blotting using antibodies specific to c-Myc (Upstate Technology), cyclin D1, p15<sup>INK4b</sup>, p27<sup>Kip1</sup> and  $\alpha$ -tubulin (Santa Cruz Biotechnology, Santa Cruz, CA). The accumulation of p15<sup>INK4b</sup> and p27<sup>KIP1</sup>, and the decrease of c-Myc and Cyclin D1 were observed at 1 nM of JTP-74057 and 10 nM of PD0325901, respectively.

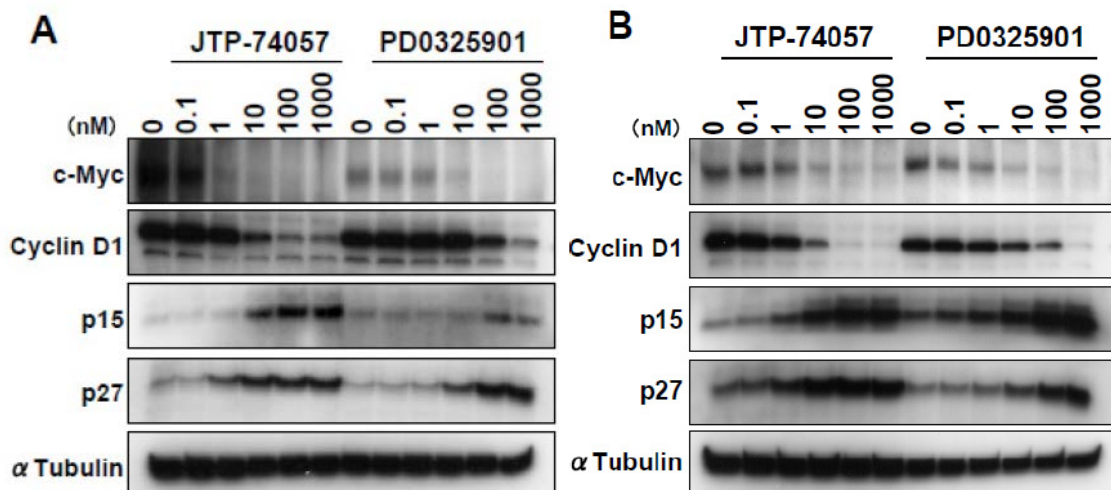

Supplement: oncotarget-03-1533-s001.pdf [file oncotarget-03-1533-s001.pdf]
